# Supplementary material for: Physico-Chemical Characteristics and Lipid Oxidative Stability of Zebra (Equus Burchelli) Droëwors Made Using Different Levels of Sheep Fat
Source: MDPI journal article supplement (doi:10.3390/foods10102497), 2021-10-18
Supplement: s1 [file s1]

**Table S1.** Moisture and water activity (mean and standard errors, n=8) of zebra droëwors made with different sheep fat levels after drying (day 2) and during storage (day 17-92).

| Day            | After drying              |                           |                           | Storage                   |                           |                           |                           |
|----------------|---------------------------|---------------------------|---------------------------|---------------------------|---------------------------|---------------------------|---------------------------|
|                | 2                         | 17                        | 32                        | 47                        | 62                        | 77                        | 92                        |
| Meat fat ratio |                           |                           |                           |                           |                           |                           |                           |
|                |                           |                           |                           | Moisture                  |                           |                           |                           |
| 90:10          | 29.56 <sup>a</sup> ± 0.88 | 28.98 <sup>a</sup> ± 0.55 | 29.45 <sup>a</sup> ± 0.71 | 28.94 <sup>a</sup> ± 1.17 | 30.25 <sup>a</sup> ± 0.73 | 29.33 <sup>a</sup> ± 0.74 | 28.10 <sup>a</sup> ± 0.61 |
| 85:15          | 27.91 <sup>a</sup> ± 0.71 | 27.27 <sup>a</sup> ± 1.17 | 29.28 <sup>a</sup> ± 0.77 | 29.37 <sup>a</sup> ± 0.57 | 26.60 <sup>a</sup> ± 0.77 | 29.14 <sup>a</sup> ± 0.60 | 29.60 <sup>a</sup> ± 0.57 |
| 80:20t         | 30.47 <sup>a</sup> ± 1.11 | 28.64 <sup>a</sup> ± 1.04 | 28.15 <sup>a</sup> ± 0.75 | 28.61 <sup>a</sup> ± 0.92 | 29.79 <sup>a</sup> ± 1.01 | 29.51 <sup>a</sup> ± 0.73 | 30.21 <sup>a</sup> ± 0.63 |
|                |                           |                           |                           | Water activity            |                           |                           |                           |
| 90:10          | 0.878 <sup>a</sup> ± 0.01 | 0.865 <sup>a</sup> ± 0.01 | 0.865 <sup>a</sup> ± 0.00 | 0.863 <sup>a</sup> ± 0.01 | 0.866 <sup>a</sup> ± 0.00 | 0.860 <sup>a</sup> ± 0.00 | 0.854 <sup>a</sup> ± 0.00 |
| 85:15          | 0.881 <sup>a</sup> ± 0.01 | 0.873 <sup>a</sup> ± 0.01 | 0.875 <sup>a</sup> ± 0.01 | 0.874 <sup>a</sup> ± 0.00 | 0.875 <sup>a</sup> ± 0.00 | 0.872 <sup>a</sup> ± 0.00 | 0.868 <sup>a</sup> ± 0.00 |
| 80:20          | 0.907 <sup>a</sup> ± 0.01 | 0.894 <sup>a</sup> ± 0.01 | 0.882 <sup>a</sup> ± 0.00 | 0.882 <sup>a</sup> ± 0.00 | 0.888 <sup>a</sup> ± 0.00 | 0.866 <sup>a</sup> ± 0.00 | 0.882 <sup>a</sup> ± 0.00 |

Moisture: g/100g

<sup>a</sup> Means in the same row with different superscripts differ ( $P \leq 0.05$ )
